# Supplementary material
Source: publisher figshare collection journal article supplement (https://acs.figshare.com/ndownloader/files/4193269)
Supplement: Supplementary file 1 [file 4193269]

# Phase boundary propagation in large LiFePO<sub>4</sub> single crystals on delithiation

Katja Weichert<sup>1</sup>, Wilfried Sigle<sup>2</sup>, Peter A. van Aken<sup>2</sup>, Janez Jamnik<sup>3</sup>, Changbao Zhu<sup>1</sup>, Ruhul Amin<sup>1</sup>, Tolga Acartürk<sup>1</sup>, Ulrich Starke<sup>1</sup> and Joachim Maier<sup>1,\*</sup>

## Supporting Information

### Appendix

We assume steady state growth and can hence ignore capacitive current elements in the below equivalent circuit.

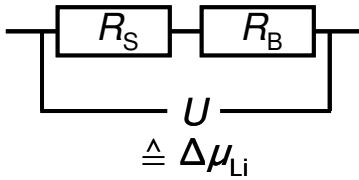

S: surface, B: bulk

$$j \propto \frac{1}{R_S + R_B} \Delta\mu_{\text{Li}}$$

$$R_S = \frac{1}{s}; \quad R_B = \frac{L}{\sigma^\delta}$$

$$\frac{dL}{dt} = \left( \frac{1}{s} + \frac{L}{\sigma^\delta} \right)^{-1} \Delta\mu_{\text{Li}}$$

$L$ : thickness of growth layer,  $s$ : reaction constant of surface (or interfacial) reaction,  $\sigma^\delta$ : ambipolar conductivity of Li

$$L = -\frac{\sigma^\delta}{s} + \sqrt{\frac{\sigma^{\delta^2}}{s^2} + 2\sigma^\delta \Delta\mu_{\text{Li}} t}$$

$L$  vs.  $t$  representation

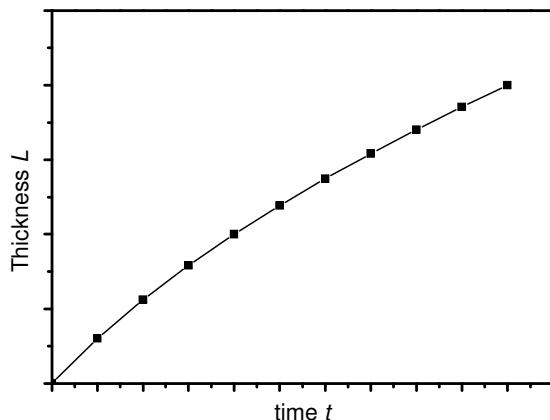

$L^2$  vs.  $t$  representation

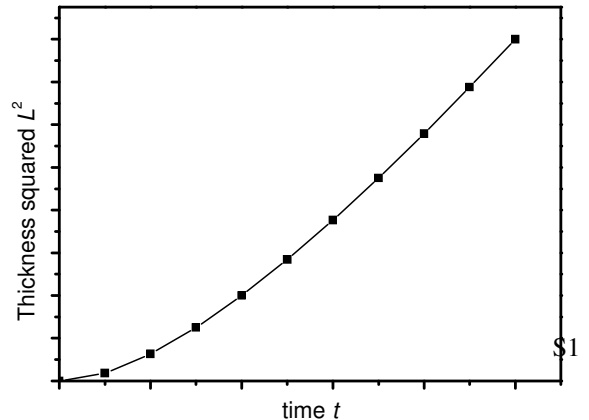

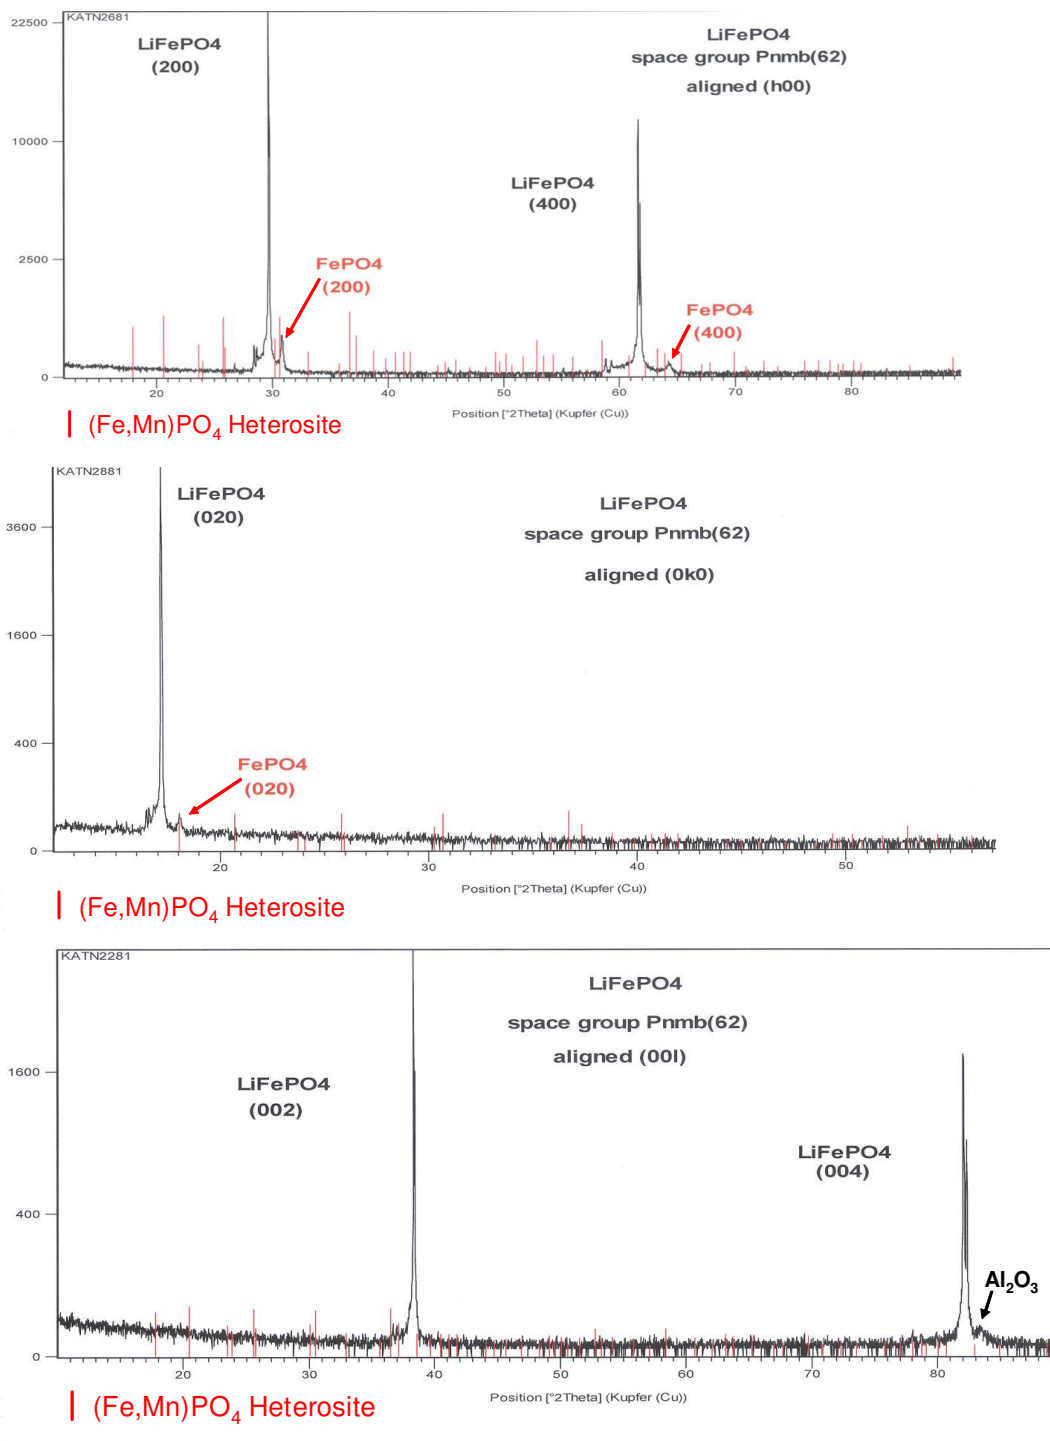

**Figure S1.** Powder XRD pattern of the partially delithiated  $\text{LiFePO}_4$  single crystal. In addition to the a) [h00], b) [0k0], and c) [00l] peaks of  $\text{LiFePO}_4$  the corresponding diffraction peaks for  $\text{FePO}_4$  can be seen demonstrating epitaxial growth of  $\text{FePO}_4$ . c) Due to the increased  $c$ -parameter in  $\text{FePO}_4$  compared to  $\text{LiFePO}_4$  and the corresponding peak shift to lower  $2\theta$  values the [002] peak of  $\text{FePO}_4$  is not visible.

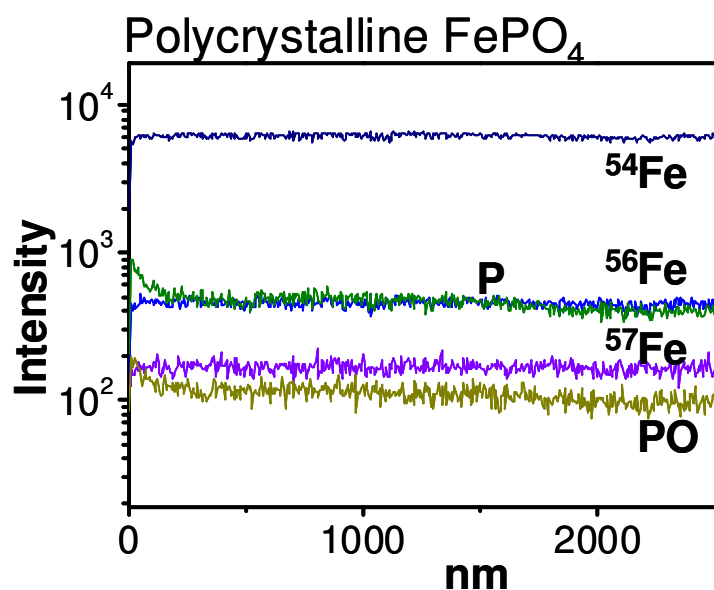

**Figure S2.** SIMS analysis of polycrystalline  $\text{FePO}_4$ .

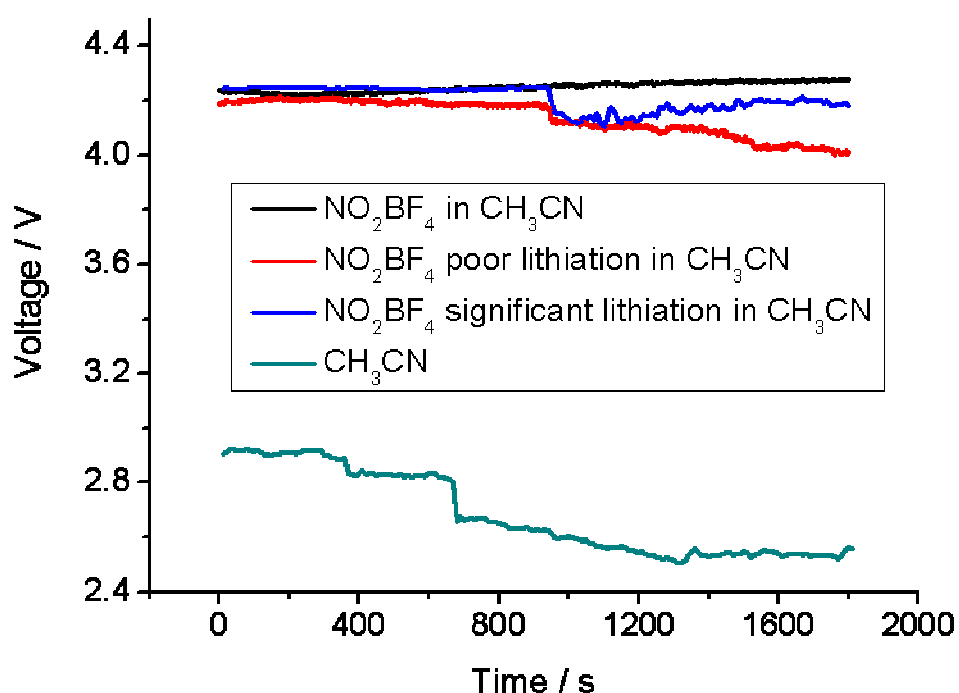

**Figure S3.** The measurement of redox potential of  $\text{NO}_2\text{BF}_4$  dissolved in acetonitrile ( $\text{CH}_3\text{CN}$ ) (cell:  $\text{NO}_2\text{BF}_4(\text{CH}_3\text{CN})$  / lithium ion conducting glass ceramic / Li foil). The redox potential of  $\text{NO}_2\text{BF}_4$  is found to be 4.2 V (black curve). Contacting  $\text{NO}_2\text{BF}_4$  with  $\text{LiFePO}_4$  and then removing it leads only to a small decrease of the potential (red curve), quite independent of the degree of lithiation (blue curve). (Note that at least  $\text{NO}_2$  leaves the system).

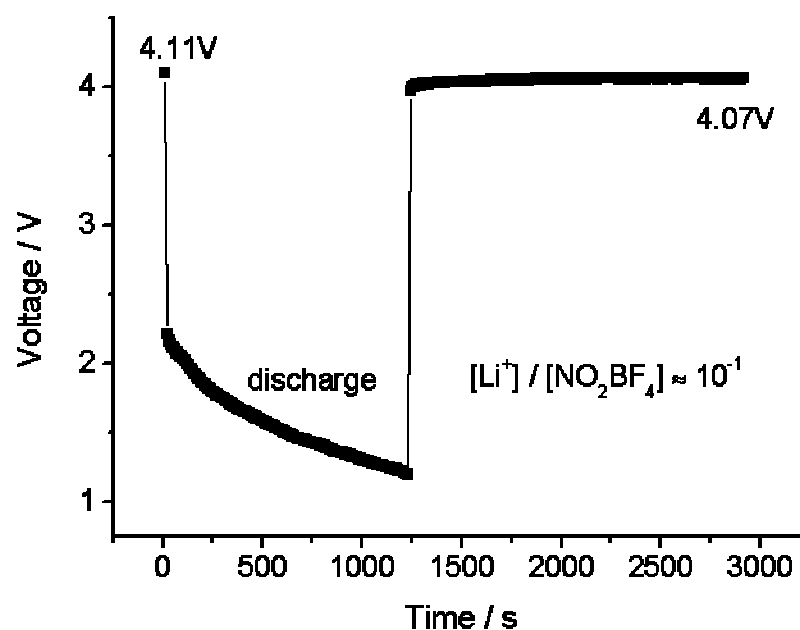

**Figure S4.** The redox potential of  $\text{NO}_2\text{BF}_4$  dissolved in acetonitrile ( $\text{CH}_3\text{CN}$ ) before and after the electrochemical incorporation of Li into the  $\text{NO}_2\text{BF}_4$  (cell:  $\text{NO}_2\text{BF}_4(\text{CH}_3\text{CN})$  / lithium ion conducting glass ceramic / Li foil). Before the discharging, the OCV is around 4.11 V, and after the discharging, the voltage goes back to 4.07 V. The mole ratio of  $\text{Li}^+$  to  $\text{NO}_2\text{BF}_4$  was around 0.1.
